# Supplementary material for: Exactin: A specific inhibitor of Factor X activation by extrinsic tenase complex from the venom of Hemachatus haemachatus
Source: PubMed Central journal article supplement (PMC4997346; doi:10.1038/srep32036), 2016-08-25
Supplement: srep32036-s1.pdf [file srep32036-s1.pdf]

1 Supporting Information for

2 **Exactin: A specific inhibitor of Factor X activation by extrinsic**  
3 **tenase complex from the venom of *Hemachatus haemachatus***  
4

5  
6 Vallerinteavide Mavelli Girish\* and R. Manjunatha Kini\*, §, ¶

7  
8 \*Department of Biological Sciences, Faculty of Science, National University of  
9 Singapore, Singapore 119260, Singapore, §Department of Biochemistry, Medical  
10 College of Virginia, Virginia Commonwealth University, Richmond, Virginia  
11 23298, USA, ¶University of South Australia, School of Pharmacy and Medical  
12 Sciences, Adelaide, South Australia 5001, Australia.

13  
14 **Supplementary figures:**

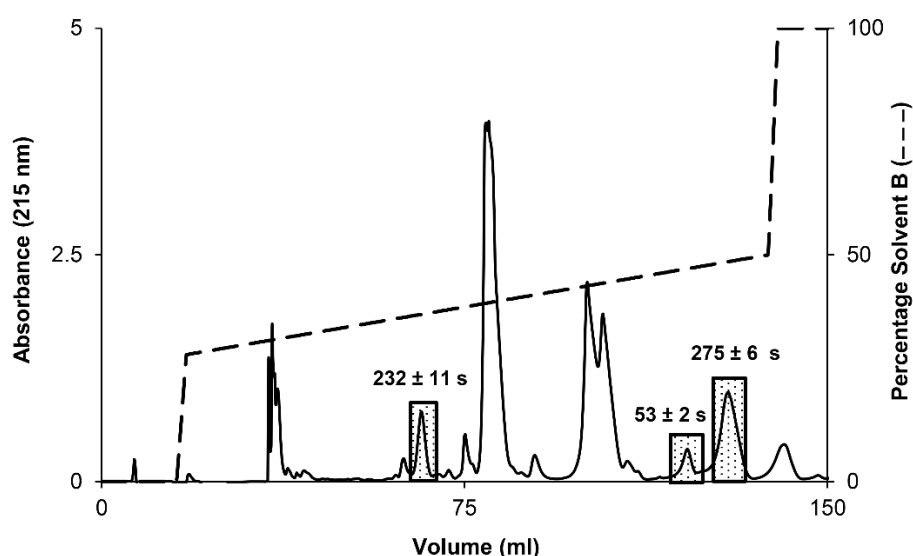

16 **Fig. S1. Effect of pooled RP-HPLC fractions of peak 4 on prothrombin time.** The fractions  
17 under each peak in RP-HPLC chromatogram (**Fig.1B**) were pooled and the effect of individual  
18 peaks on the prolongation of prothrombin time in human plasma was examined using a BBL  
19 fibrometer (Becton Dickinson and Co., Sparks, MD, USA). Only two pooled fractions (exactin  
20 peak denoted by *solid arrow* and peak denoted by *open arrow* in **Fig.1B**) prolonged the  
21 prothrombin time significantly in the plasma (>200 s at 0.2 mg/ml).

**A**

LE~~X~~YQKSKVVT~~X~~QPEQKF~~X~~YSDDTTFMFPNHPVYLSG~~X~~TFS~~X~~TEEGNRR~~X~~~~X~~TTDK~~X~~NR

**B**

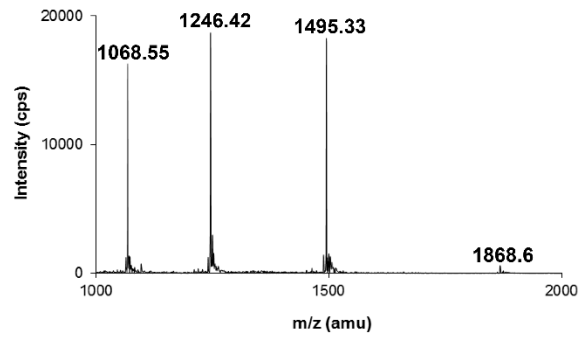

22

23 **Fig.S2. Reduction and pyridylethylation of exactin.** (A) The complete sequence of exactin  
24 derived by Edman degradation with residues corresponding to cysteines denoted by 'X' (blank  
25 cycles corresponded to conserved cysteine residues in 3FTxs). (B) The ESI-MS of S-  
26 pyridylethylated exactin showing the four peaks of mass/charge (m/z) ratio ranging from +4 to  
27 +7 charges. The mass determined to be  $7470.91 \pm 1.6$  Da corresponds to eight cysteine residues  
28 in the protein.

29

30

31

32

33

34

35

36

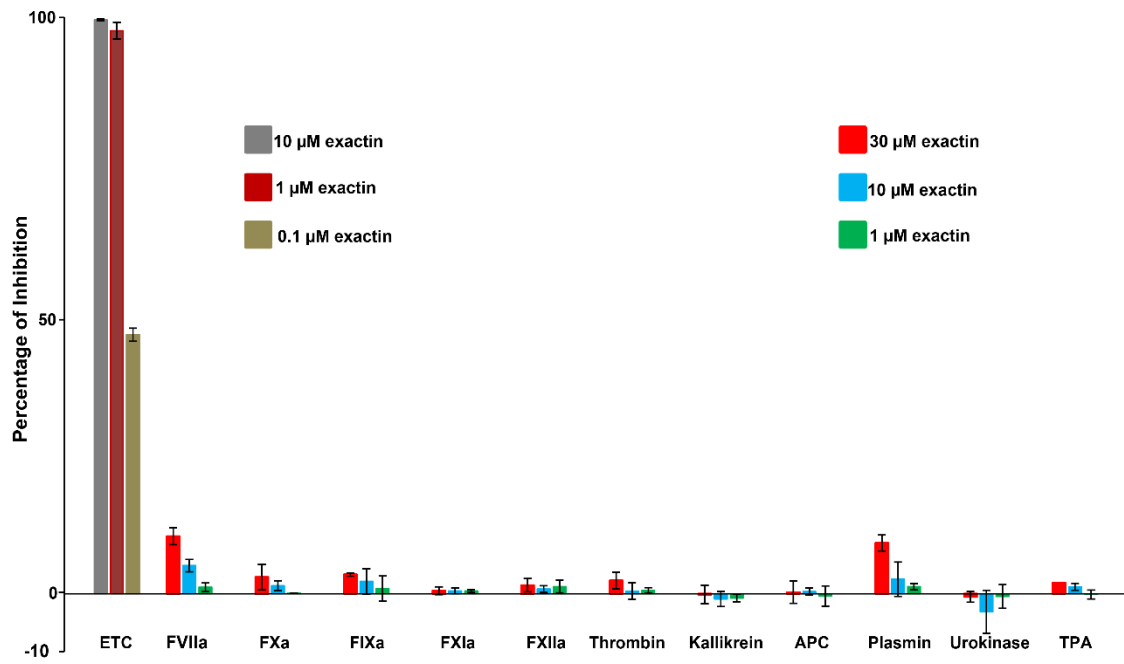

37

38 **Fig.S3. Serine protease specificity of exactin.** Exactin was screened against 10 serine  
 39 proteases: procoagulant serine proteases (FVIIa [300 nM], FXa [1 nM], FIXa [300 nM], FXIa  
 40 [0.125 nM], FXIIa [20 nM],  $\alpha$ -thrombin [3 nM], kallikrein [1 nM]), anticoagulant serine  
 41 protease APC [2.5 nM] and fibrinolytic serine proteases (plasmin [3.6 nM], urokinase [40  
 42 units/ml] and t-PA [37 nM]). Exactin is a poor inhibitor with  $IC_{50}$  values  $\gg 300 \mu M$  when  
 43 compared to the inhibition to the full extrinsic tenase complex (ETC) [ $IC_{50} 116 \pm 3.28$  nM]. All  
 44 the experiments were done at  $37^{\circ}C$ . The hydrolysis of chromogenic substrates S-2222 (500  
 45  $\mu M$ /FXa), S-2288 (500  $\mu M$ /FVIIa; 1 mM/t-PA), S-2238 (250  $\mu M$ / $\alpha$ -thrombin), S-2251 (1.2  
 46 mM/plasmin), S-2444 (0.3 mM/urokinase), S-2366 (0.67 mM/APC; 1 mM/FXIa), S-2302 (1  
 47 mM/FXIIa, kallikrein) and Spectrozyme FIXa (1 mM) were measured at 405 nm. Each data  
 48 point represents the average  $\pm$  SD of three independent experiments.

49

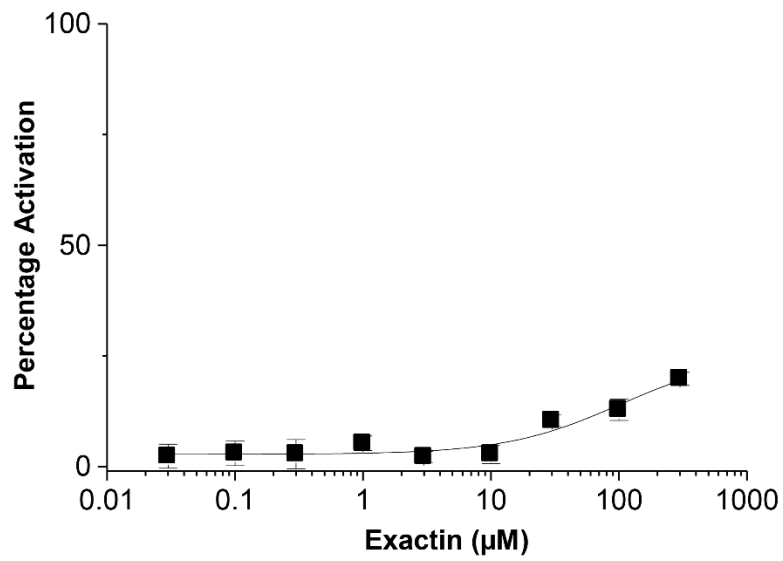

50

51 **Fig.S4. Effect of exactin on FX activation by FVIIa in the absence of TF and**  
52 **phospholipids.** A slight enhancement in FX activation was observed. Each data point  
53 represents the average of three independent experiments.

54

55

56

57

58

59

60

61

62

63

64

65

66

67

68 **Supplementary tables:**

69 **Table S1. Kinetic parameters: Effect of exactin on FX activation by**  
 70 **FVIIa/TF/phospholipids**

| <b>Exactin (nM)</b> | <b>Km (nM)</b> | <b>Kcat (s<sup>-1</sup>)</b> | <b>Kcat/Km (s<sup>-1</sup> nM<sup>-1</sup>)</b> |
|---------------------|----------------|------------------------------|-------------------------------------------------|
| 0                   | 14.57 ± 0.87   | 1.7 ± 0.017                  | 0.117 ± 0.055                                   |
| 30                  | 8.31 ± 0.72    | 0.95 ± 0.98                  | 0.114 ± 0.008                                   |
| 100                 | 6.46 ± 1.98    | 0.623 ± 0.2                  | 0.095 ± 0.012                                   |
| 300                 | 5.66 ± 1.9     | 0.32 ± 0.124                 | 0.057 ± 0.013                                   |

71

72

73

74

75

76

77 **Table S2. Kinetic parameters: Effect of exactin on FX activation by FVIIa/phospholipids**

| <b>Exactin (nM)</b> | <b>Km (nM)</b> | <b>Kcat (s<sup>-1</sup>)</b> | <b>Kcat/Km (s<sup>-1</sup> nM<sup>-1</sup>)</b> |
|---------------------|----------------|------------------------------|-------------------------------------------------|
| 0                   | 36.56 ± 2.76   | 0.0558 ± 0.0046              | 0.0015 ± 0.00014                                |
| 30                  | 23.75 ± 2.71   | 0.0346 ± 0.0026              | 0.00145 ± 0.0002                                |
| 100                 | 18.37 ± 1.49   | 0.0262 ± 0.0035              | 0.00142 ± 0.0002                                |
| 300                 | 12.22 ± 1.029  | 0.0151 ± 0.0031              | 0.0013 ± 0.00026                                |

78

79

80 **Table S3. Kinetic parameters: Effect of exactin on FX activation by FVIIa/sTF**

| <b>Exactin (<math>\mu\text{M}</math>)</b> | <b>Km (<math>\mu\text{M}</math>)</b> | <b>Kcat (<math>\text{s}^{-1}</math>)</b> | <b>Kcat/Km (<math>\text{s}^{-1} \mu\text{M}^{-1}</math>)</b> |
|-------------------------------------------|--------------------------------------|------------------------------------------|--------------------------------------------------------------|
| 0                                         | $1.03 \pm 0.089$                     | $0.0017 \pm 6.13 \text{ E-}05$           | $0.0016 \pm 0.0001$                                          |
| 100                                       | $0.76 \pm 0.126$                     | $0.0011 \pm 6.01 \text{ E-}06$           | $0.0014 \pm 0.0002$                                          |
| 300                                       | $0.42 \pm 0.022$                     | $0.0004 \pm 6.66 \text{ E-}05$           | $0.0009 \pm 0.0002$                                          |

81

82 **Table S4. Kinetic parameters: Effect of exactin on FIX activation by**

83 **FVIIa/TF/phospholipids**

| <b>Exactin (<math>\mu\text{M}</math>)</b> | <b>Km (nM)</b>    | <b>Kcat (<math>\text{s}^{-1}</math>)</b> | <b>Kcat/Km (<math>\text{s}^{-1} \text{nM}^{-1}</math>)</b> |
|-------------------------------------------|-------------------|------------------------------------------|------------------------------------------------------------|
| 0                                         | $299.13 \pm 7.84$ | $1.34 \pm 0.012$                         | $0.0044 \pm 0.00015$                                       |
| 10                                        | $231.83 \pm 6.83$ | $0.94 \pm 0.0007$                        | $0.004 \pm 0.0001$                                         |
| 30                                        | $189 \pm 11.72$   | $0.744 \pm 0.018$                        | $0.0039 \pm 0.00017$                                       |
| 100                                       | $156.2 \pm 2.74$  | $0.353 \pm 0.01$                         | $0.0022 \pm 0.00006$                                       |

84

85 **Table S5. Kinetic parameters: Effect of exactin on FX activation by**

86 **FIXa/FVIIIa/phospholipids**

| <b>Exactin (<math>\mu\text{M}</math>)</b> | <b>Km (nM)</b>  | <b>Kcat (<math>\text{s}^{-1}</math>)</b> | <b>Kcat/Km (<math>\text{s}^{-1} \text{nM}^{-1}</math>)</b> |
|-------------------------------------------|-----------------|------------------------------------------|------------------------------------------------------------|
| 0                                         | $4.31 \pm 0.62$ | $0.48 \pm 0.064$                         | $0.11 \pm 0.012$                                           |
| 3                                         | $3.26 \pm 0.46$ | $0.07 \pm 0.0024$                        | $0.021 \pm 0.002$                                          |
| 5                                         | $3.21 \pm 0.24$ | $0.042 \pm 0.004$                        | $0.013 \pm 0.002$                                          |
| 10                                        | $3.23 \pm 0.24$ | $0.022 \pm 0.004$                        | $0.007 \pm 0.002$                                          |

87 **Table S6. Kinetic parameters: Effect of exactin on FX activation by RVV-X**

| <b>Exactin (<math>\mu\text{M}</math>)</b> | <b>K<sub>m</sub> (nM)</b> | <b>K<sub>cat</sub> (s<sup>-1</sup>)</b> | <b>K<sub>cat</sub>/K<sub>m</sub> (s<sup>-1</sup> nM<sup>-1</sup>)</b> |
|-------------------------------------------|---------------------------|-----------------------------------------|-----------------------------------------------------------------------|
| 0                                         | 8.48 ± 1.06               | 0.85 ± 0.027                            | 0.101 ± 0.01                                                          |
| 3                                         | 8.49 ± 0.55               | 0.23 ± 0.044                            | 0.0272 ± 0.006                                                        |
| 5                                         | 9.19 ± 0.53               | 0.19 ± 0.023                            | 0.021 ± 0.002                                                         |
| 7                                         | 8.56 ± 0.32               | 0.15 ± 0.018                            | 0.017 ± 0.0015                                                        |

88
